# Supplementary material for: Self-supported nickel iron oxide nanospindles with high hydrophilicity for efficient oxygen evolution
Source: Royal Society of Chemistry journal article supplement (doi:10.1039/c9cc05752h), 2019-01-01
Supplement: c9cc05752h1.pdf [file c9cc05752h1.pdf]

# Self-supported nickel iron oxide nanospindles with high hydrophilicity for efficient oxygen evolution

*Jinlong Liu,<sup>abc‡</sup> Huimin Yuan,<sup>a‡</sup> Zhenyu Wang,<sup>a</sup> Jun Li,<sup>a</sup> Mingyang Yang,<sup>a</sup> Lujie Cao,<sup>a</sup> Guiyu Liu,<sup>b</sup> Dong Qian,<sup>b</sup> and Zhouguang Lu<sup>\*a</sup>*

<sup>a</sup>Department of Materials Science and Engineering, Southern University of Science and Technology, Shenzhen 518055, China

<sup>b</sup>Hunan Provincial Key Laboratory of Chemical Power Resources, Hunan Provincial Key Laboratory of Efficient and Clean Utilization of Manganese Resources, College of Chemistry and Chemical Engineering, Central South University, Changsha 410083, China

<sup>c</sup>Department of Engineering, University of Cambridge, Cambridge, CB3 0FA, United Kingdom

<sup>‡</sup>J. Liu and H. Yuan contributed equally to this work.

<sup>\*</sup>Corresponding Author: Zhouguang Lu, E-mail address: [luzg@sustech.edu.cn](mailto:luzg@sustech.edu.cn)

## Experimental section

**Preparation of NiFe<sub>2</sub>O<sub>4</sub>@FNF:** NiFe<sub>2</sub>O<sub>4</sub> nanospindle arrays were grown in situ on FNF (thickness 1 mm, YiYang Foam Metal New Material Co., Ltd) through a facile hydrothermal method. According to previous report,<sup>1,2</sup> the in-situ growth can be explained by a dissolution-precipitation mechanism. Specifically, the HCl first corrodes the surface of FeNi<sub>3</sub> foam to Fe and Ni ions. Once the HCl is consumed completely, the generated mixed metal ions further deposit on the FeNi<sub>3</sub> substrate to form NiFe<sub>2</sub>O<sub>4</sub> nanospindle arrays. Typically, a piece of FNF (1 cm × 4 cm) was cleaned in 3 M HCl solution (Sigma-Aldrich, ACS reagent, 37%) and ethanol (Sigma-Aldrich, ≥99.8%) under sonication, and then rinsed with ultra-pure water for use. To prepare the hydrothermal solution, concentrated HCl was diluted with ultra-pure water until the pH of the solution was 2.5, which was measured by a pH meter (Mettler Toledo EL20-Kit Benchtop Education). 40 mL of as-prepared HCl solution was added into a 50 mL Teflon-lined stainless steel autoclave, followed by immersing the cleaned FNF into the acid solution. The autoclave was sealed and kept in a pre-heated oven at 180 °C for 6 h. After natural cooling, the product was collected and underwent ultrasonic treatment for 30 s to remove loosely attached particles. Afterwards, the product was rinsed by water and ethanol for several times, and further dried in a vacuum oven at 60 °C overnight.

**Preparation of Ni(OH)<sub>2</sub>/NF:** Ni(OH)<sub>2</sub> nanoplate arrays supported on NF (thickness 1 mm, YiYang Foam Metal New Material Co., Ltd) were synthesized for comparison by the same procedures as for the preparation of NiFe<sub>2</sub>O<sub>4</sub>@FNF, except that the FNF was replaced with NF.

**Preparation of IrO<sub>2</sub>/NF:** Commercial IrO<sub>2</sub> (Sigma-Aldrich, 99.9% trace metals basis) catalyst as benchmark OER electrocatalyst was loaded on NF by the same approach in previous report.<sup>3</sup>

**Samples for hydrophilicity measurements:** To evaluate and compare the hydrophilicity of NiFe<sub>2</sub>O<sub>4</sub>@FNF and the control groups, FeNi<sub>3</sub> foam and Ni foam were pressed into flat plates by a roll squeezer and underwent the same hydrothermal treatment as the preparation of NiFe<sub>2</sub>O<sub>4</sub>@FNF and Ni(OH)<sub>2</sub>@NF to obtain NiFe<sub>2</sub>O<sub>4</sub>@pFNF and Ni(OH)<sub>2</sub>@pNF, respectively.

### **Material Characterizations**

SEM images were collected on a Quanta 450 field-emission scanning electron microscope. TEM, SAED and HRTEM characterizations were carried out with a Tecnai G<sup>2</sup> F30 transmission electron microscope. XRD patterns were recorded using a Japan Rigaku MiniFlex X-ray diffractometer with graphite monochromatized Cu K $\alpha$  radiation ( $\lambda = 1.540598 \text{ \AA}$ ). XPS spectra were acquired by an ESCALab250 XPS spectrometer.

### **Electrochemical Measurements**

The electrochemical properties of all samples were investigated on a 760D electrochemical workstation (CH Instruments, Inc., USA) using a standard three-electrode glass cell (Pine Research Instruments, USA), in which NiFe<sub>2</sub>O<sub>4</sub>@FNF, IrO<sub>2</sub>/NF, Ni(OH)<sub>2</sub>/NF, pristine FNF and NF were used as working electrode, a carbon rod as the counter electrode, an Ag/AgCl (4 M KCl) electrode as the reference electrode, and the electrolyte was 1.0 M KOH (Sigma-Aldrich, reagent grade, 90%) aqueous solution. Prior to the electrochemical measurements, the electrolyte was purged with O<sub>2</sub> for 30 min to reach O<sub>2</sub>/H<sub>2</sub>O equilibrium at 1.23 V vs. RHE. After several CV cycling at a scan rate of 10 mV s<sup>-1</sup> to get stabilized signals, the LSV curves were collected at a scan rate of 1 mV s<sup>-1</sup> to evaluate the OER polarization. Chronoamperometry was adopted to study the durability in prolonged operation. CV curves in a potential window of 0.85–0.90 V vs. RHE at different

scan rates from 10 to 50 mV s<sup>-1</sup> were recorded to calculate the C<sub>dl</sub>. Electrochemical impedance spectroscopy (EIS) was measured at 1.50 V vs. RHE in the frequency range from 0.1 Hz to 100 kHz with an amplitude of 5 mV. All the potentials vs. Ag/AgCl were converted to a RHE scale according to the Nernst equation:  $E(\text{RHE}) = E(\text{Ag/AgCl}) + 0.205 + 0.059 \times \text{pH}$ , and iR correction was conducted using the solution resistance (R<sub>s</sub>) estimated from the EIS simulation result. The apparent current density was normalized to the geometrical area of working electrode. All electrochemical measurements were performed at room temperature.

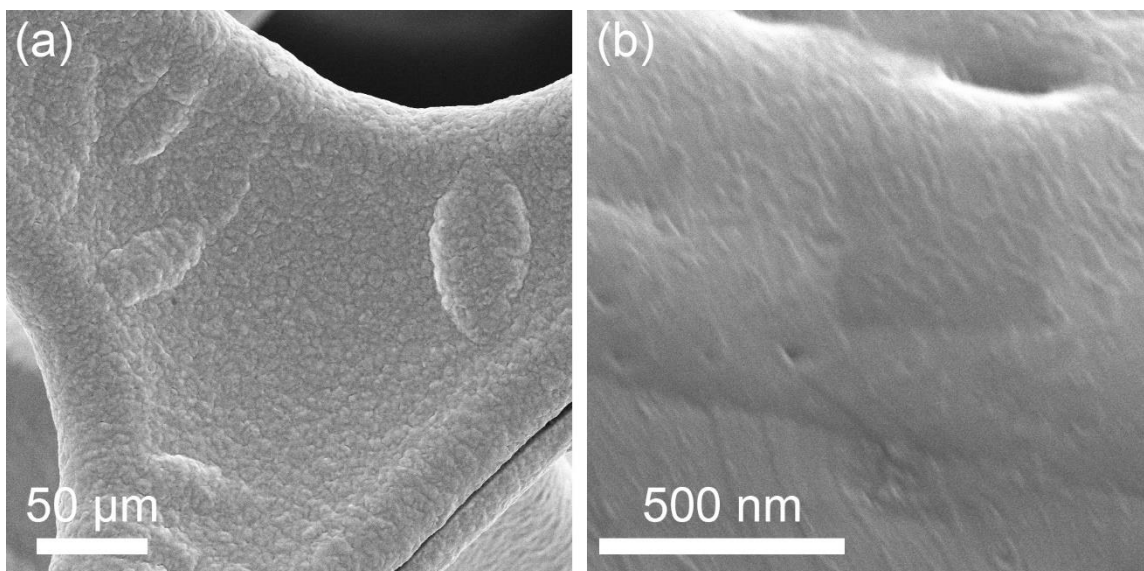

**Fig. S1** SEM images of pristine FeNi<sub>3</sub> foam.

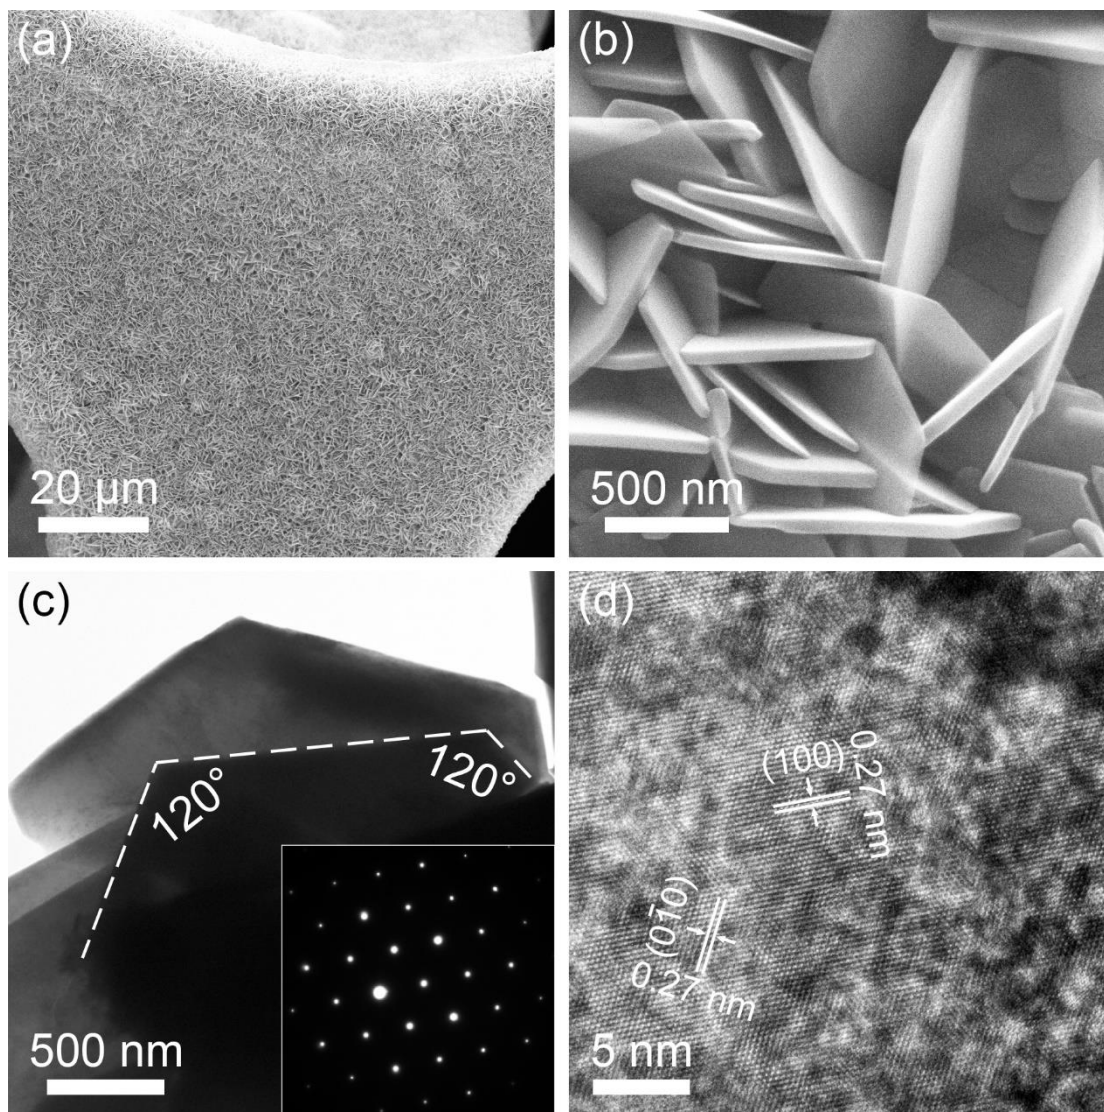

**Fig. S2** (a,b) SEM images of Ni(OH)<sub>2</sub>@NF. (c) TEM, and d) HRTEM images of corresponding Ni(OH)<sub>2</sub> nanoplates. The inset in panel (c) shows the SAED pattern of Ni(OH)<sub>2</sub> nanoplates.

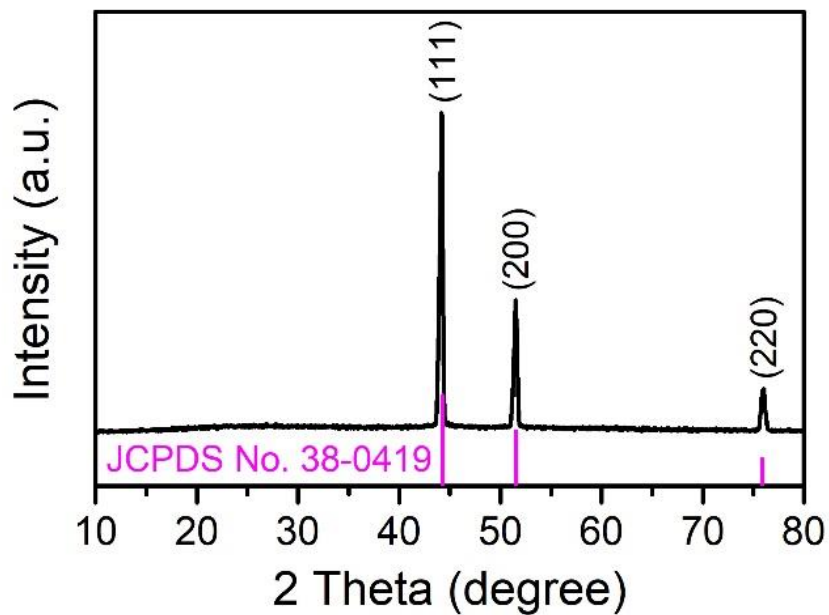

**Fig. S3** XRD pattern of FeNi<sub>3</sub> alloy foam with standard XRD pattern of FeNi<sub>3</sub> for reference.

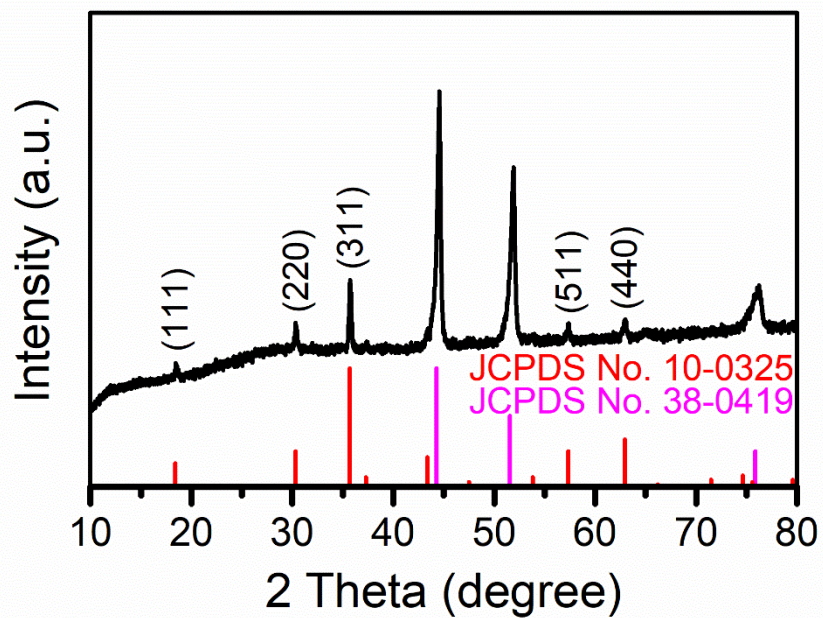

**Fig. S4** XRD pattern of NiFe<sub>2</sub>O<sub>4</sub>@FNF with standard XRD patterns of NiFe<sub>2</sub>O<sub>4</sub> and FeNi<sub>3</sub> for reference.

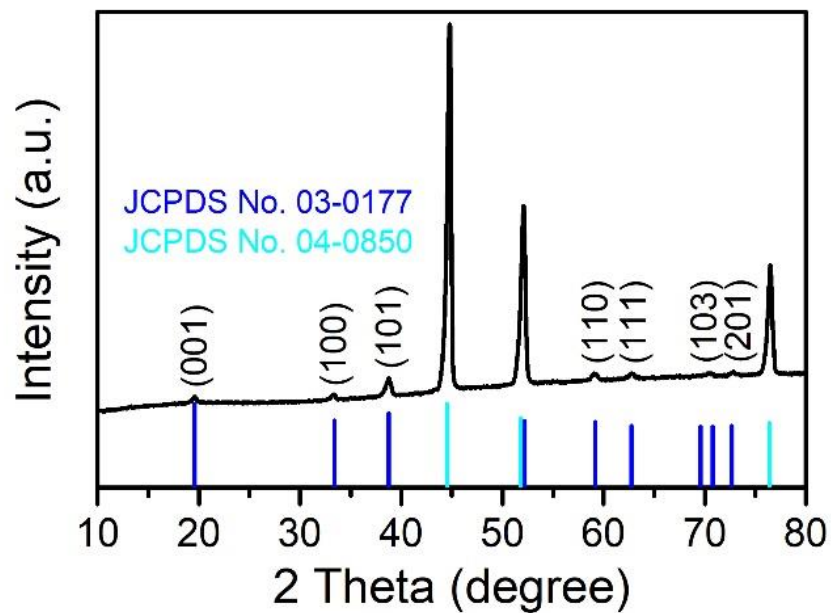

**Fig. S5** XRD pattern of Ni(OH)<sub>2</sub>@NF with standard XRD patterns of Ni(OH)<sub>2</sub> and Ni for reference.

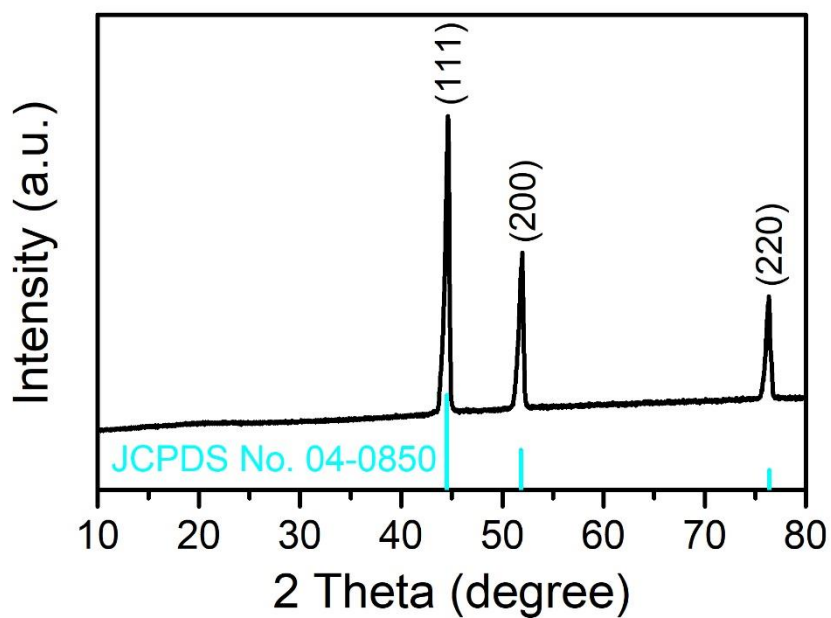

**Fig. S6** XRD pattern of Ni foam with standard XRD pattern of Ni for reference.



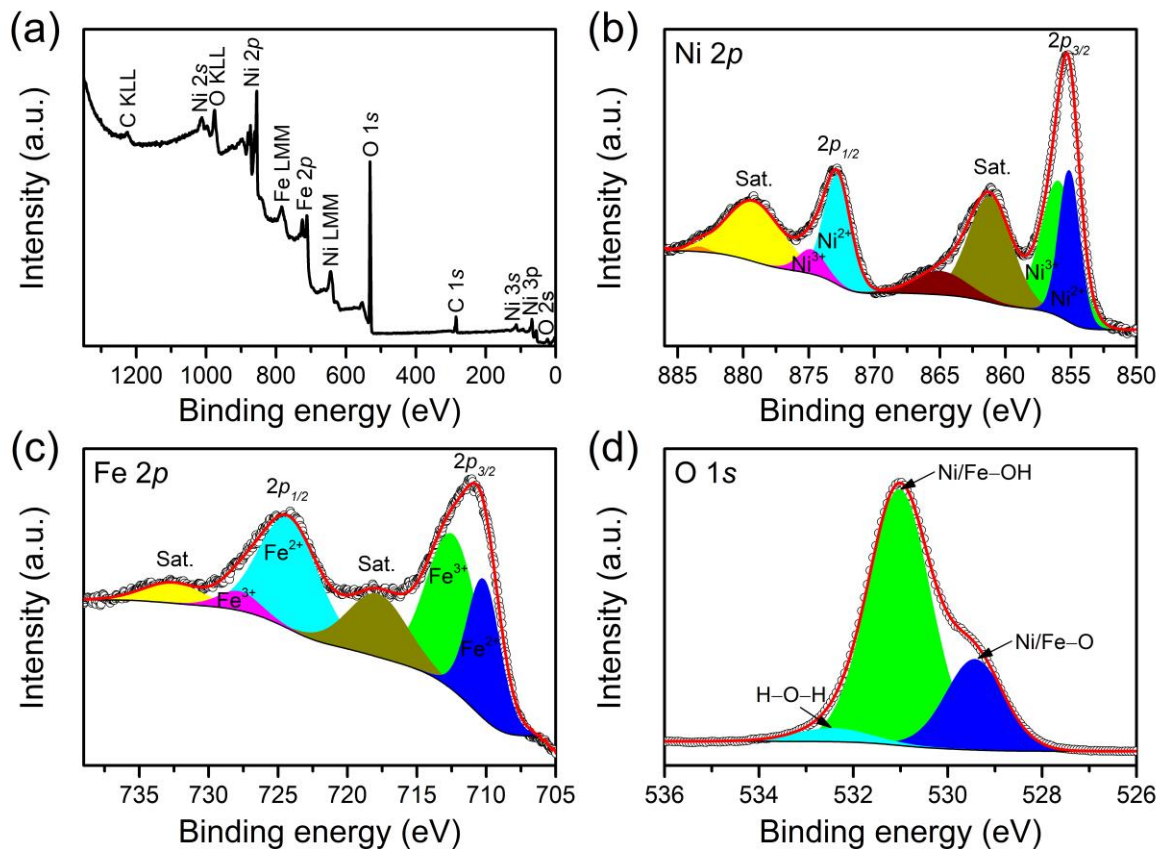

**Fig. S7** (a) Survey XPS spectrum, (b) Ni 2p, (c) Fe 2p, and (d) O 1s high-resolution XPS spectra of NiFe<sub>2</sub>O<sub>4</sub>@FNF.

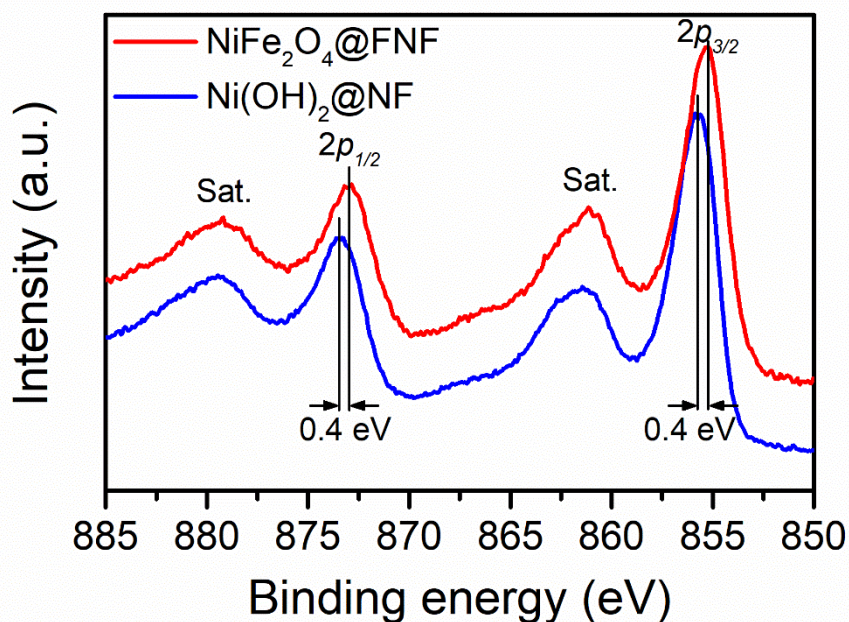

**Fig. S8** Comparison of Ni 2p high-resolution XPS spectra for NiFe<sub>2</sub>O<sub>4</sub>@FNF and Ni(OH)<sub>2</sub>@NF.

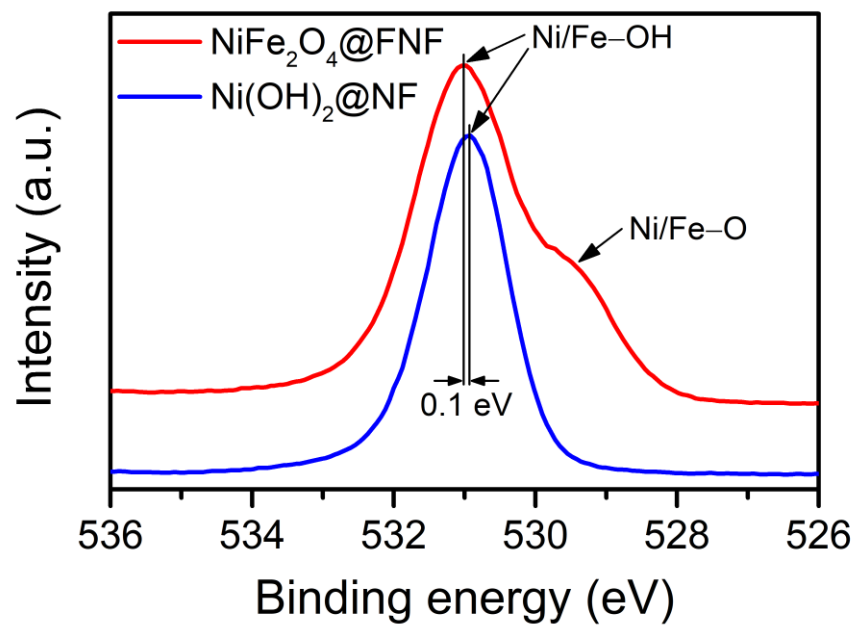

**Fig. S9** Comparison of O 1s high-resolution XPS spectra for NiFe<sub>2</sub>O<sub>4</sub>@FNF and Ni(OH)<sub>2</sub>@NF.

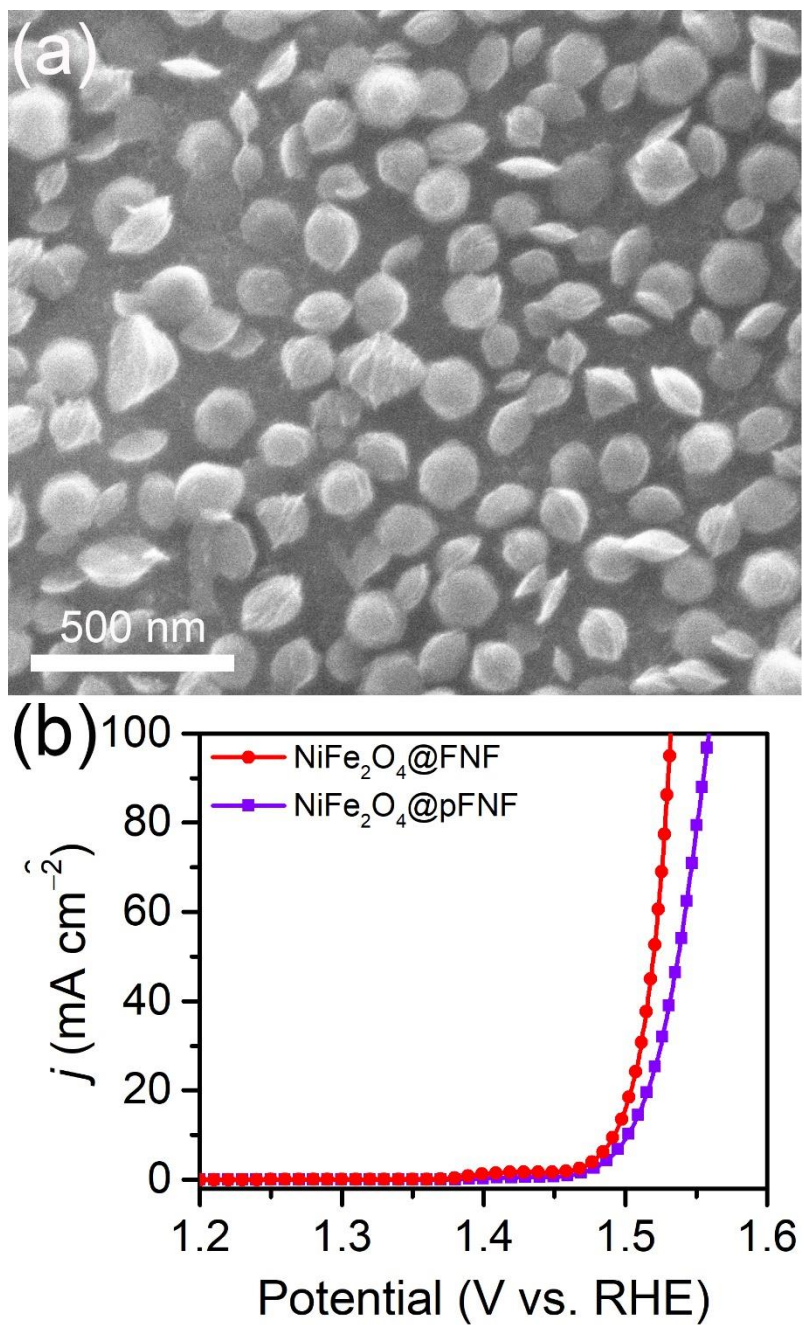

**Fig. S10** (a) SEM image of NiFe<sub>2</sub>O<sub>4</sub>@pFNF. (b) OER polarization curves of NiFe<sub>2</sub>O<sub>4</sub>@FNF and NiFe<sub>2</sub>O<sub>4</sub>@pFNF in 1.0 M KOH at a scan rate of 1 mV s<sup>-1</sup>.

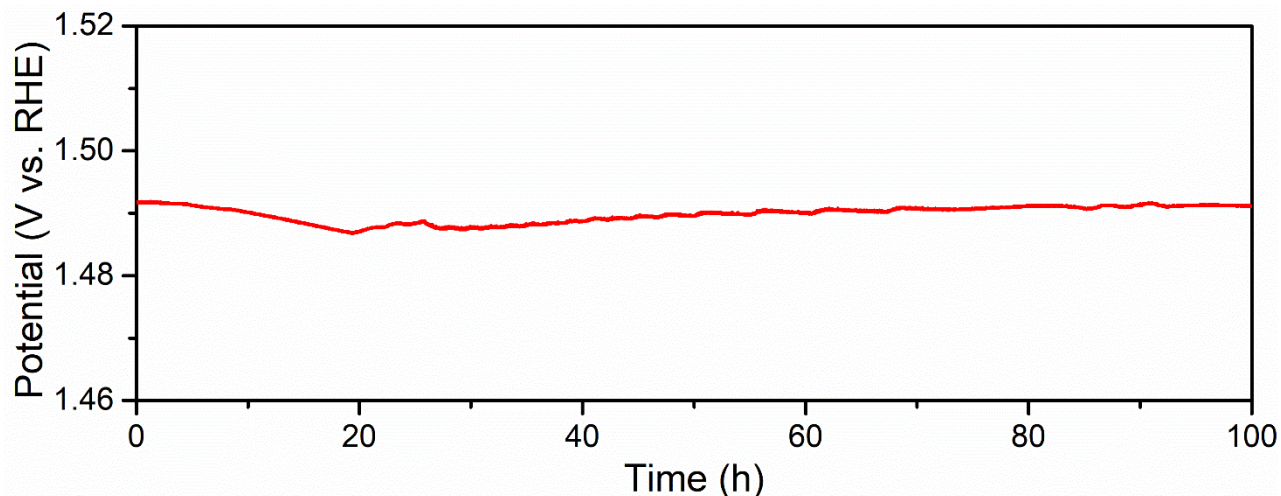

**Fig. S11** Chronopotentiometric curve of NiFe<sub>2</sub>O<sub>4</sub>@FNF in 1.0 M KOH to deliver 10 mA cm<sup>-2</sup> for 100 h.

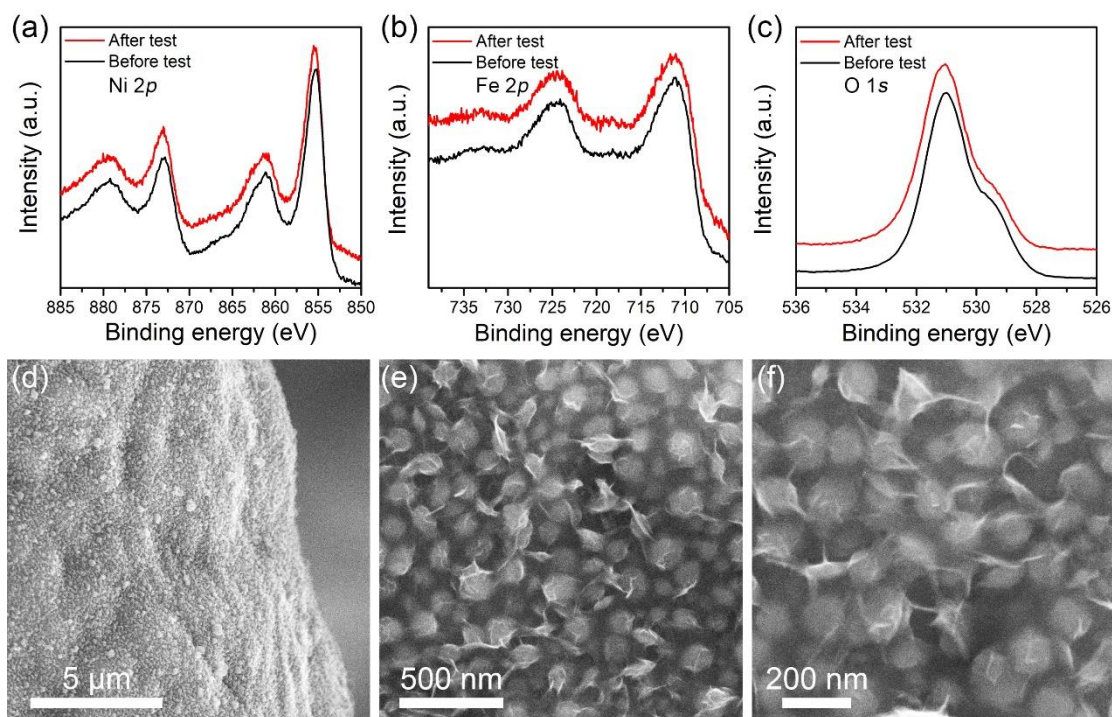

**Fig. S12** (a) Ni 2p, (b) Fe 2p, and (c) O 1s high-resolution XPS spectra of NiFe<sub>2</sub>O<sub>4</sub>@FNF before and after OER stability test. (d–f) SEM images of NiFe<sub>2</sub>O<sub>4</sub>@FNF after OER stability test.



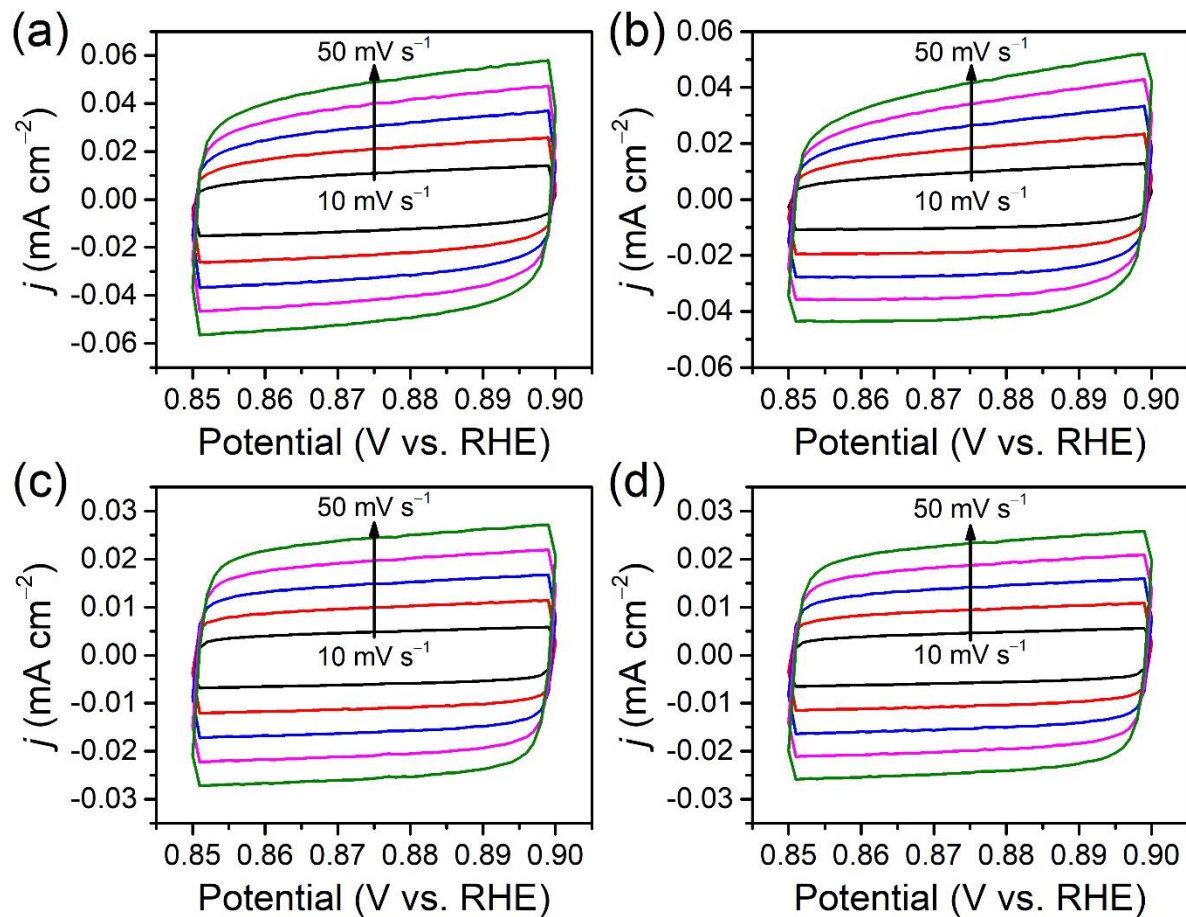

**Fig. S13** CV curves of (a) NiFe<sub>2</sub>O<sub>4</sub>@FNF, (b) Ni(OH)<sub>2</sub>@NF, (c) FNF, and (d) NF in a potential window of 0.85–0.90 V vs. RHE without faradaic processes at scan rates from 10 to 50 mV s<sup>-1</sup>.

**Table S1.** Comparison of NiFe<sub>2</sub>O<sub>4</sub> based OER electrocatalysts in alkaline electrolyte.

| Catalysts                                                 | Electrode     | Electrolyte | OER $\eta_{10}$<br>(mV) | OER Tafel slop<br>(mV dec <sup>-1</sup> ) | Ref.      |
|-----------------------------------------------------------|---------------|-------------|-------------------------|-------------------------------------------|-----------|
| NiFe <sub>2</sub> O <sub>4</sub> @FNF                     | FeNi foam     | 1.0 M KOH   | 262                     | 39.5                                      | This work |
| FeNi/NiFe <sub>2</sub> O <sub>4</sub> @NC-800             | Glassy carbon | 1.0 M KOH   | 316                     | 60                                        | 4         |
| NiFe <sub>2</sub> O <sub>4</sub>                          | Carbon paper  | 1.0 M KOH   | 381                     | 46.4                                      | 5         |
| AT NiFe <sub>2</sub> O <sub>4</sub> QDs                   | Glassy carbon | 1.0 M KOH   | 262                     | 37                                        | 6         |
| NiFe <sub>2</sub> O <sub>4</sub> nanorods                 | Glassy carbon | 1.0 M KOH   | 342                     | 44                                        | 7         |
| NiFe <sub>2</sub> O <sub>4</sub> nanosheets               | Glassy carbon | 1.0 M NaOH  | 460                     | 80                                        | 8         |
| S-NiFe <sub>2</sub> O <sub>4</sub> /Ni <sub>3</sub> Fe/NW | Ni wire       | 1.0 M KOH   | 240                     | 35                                        | 9         |
| NiFe <sub>2</sub> O <sub>4</sub> /NF                      | Ni foam       | 1.0 M KOH   | 293                     | 98                                        | 10        |
| NiO-NiFe <sub>2</sub> O <sub>4</sub> /rGO                 | Glassy carbon | 1.0 M KOH   | 296                     | 42.8                                      | 11        |
| Nickel-iron oxide/carbon                                  | Glassy carbon | 1.0 M KOH   | 310                     | 42                                        | 12        |
| S-NiFe <sub>2</sub> O <sub>4</sub> /NF                    | Ni foam       | 1.0 M KOH   | 267                     | 36.7                                      | 13        |

**Table S2.** Comparison of recently reported earth-abundant electrocatalysts for the OER in alkaline electrolyte.

| Catalysts                                                                                  | Electrode          | Electrolyte | OER (mV) | $\eta_{10}$ | OER Tafel slop (mV dec <sup>-1</sup> ) | Ref.      |
|--------------------------------------------------------------------------------------------|--------------------|-------------|----------|-------------|----------------------------------------|-----------|
| NiFe <sub>2</sub> O <sub>4</sub> @FNF                                                      | FeNi foam          | 1.0 M KOH   | 262      |             | 39.5                                   | This work |
| NiCo nanopyramid                                                                           | Cu foil            | 1.0 M NaOH  | 307      |             | 63                                     | 14        |
| Fe <sub>0.4</sub> Co <sub>0.6</sub> composite film                                         | Carbon fiber paper | 1.0 M KOH   | 283      |             | 34                                     | 15        |
| Fe-Ni nanoparticle                                                                         | Glassy carbon      | 1.0 M NaOH  | 311      |             | -                                      | 16        |
| NiFe@g-C <sub>3</sub> N <sub>4</sub> /CNT                                                  | Glassy carbon      | 1.0 M KOH   | 326      |             | 67                                     | 17        |
| De-LiCo <sub>0.33</sub> Ni <sub>0.33</sub> Fe <sub>0.33</sub> O <sub>2</sub>               | Carbon fiber paper | 0.1 M KOH   | 295      |             | 35                                     | 18        |
| L-Co <sub>3</sub> O <sub>4</sub>                                                           | Carbon fiber       | 1.0 M KOH   | 294      |             | 74                                     | 19        |
| Ni <sub>x</sub> Co <sub>y</sub> O <sub>4</sub> (x/y = 1/4)                                 | Glassy carbon      | 1.0 M KOH   | 336      |             | 36                                     | 20        |
| PrBa <sub>0.5</sub> Sr <sub>0.5</sub> Co <sub>1.5</sub> Fe <sub>0.5</sub> O <sub>5+δ</sub> | Glassy carbon      | 0.1 M KOH   | 358      |             | 52                                     | 21        |
| Iron fluoride-oxide nanoporous film                                                        | Fe foil            | 1.0 M KOH   | 260      |             | 45                                     | 22        |
| Exfoliated NiFe LDH nanosheet                                                              | Glassy carbon      | 1.0 M KOH   | 300      |             | 40                                     | 23        |
| α-Co(OH) <sub>2</sub> -Cl                                                                  | Glassy carbon      | 1.0 M KOH   | 320      |             | 53                                     | 24        |
| Co(OH) <sub>2</sub> @NCNT@NF                                                               | Ni foam            | 1.0 M KOH   | 270      |             | 72                                     | 25        |
| CoN-1 min                                                                                  | Ni foam            | 1.0 M KOH   | 290      |             | 70                                     | 26        |
| Co <sub>4</sub> N porous nanowire                                                          | Carbon cloth       | 1.0 M KOH   | 257      |             | 44                                     | 27        |
| Mn <sub>3</sub> N <sub>2</sub>                                                             | Nickel foam        | 1.0 M KOH   | 270      |             | 101                                    | 28        |
| CoP@RGO                                                                                    | Glassy carbon      | 1.0 M KOH   | 280      |             | 75                                     | 29        |
| Fe <sub>1.1</sub> Mn <sub>0.9</sub> P nanorods                                             | Glassy carbon      | 1.0 M KOH   | 440      |             | 39                                     | 30        |
| Ni <sub>0.65</sub> Fe <sub>0.35</sub> P                                                    | Glassy carbon      | 1.0 M KOH   | 270      |             | 60                                     | 31        |

**Table S3.** Electrochemical analysis of NiFe<sub>2</sub>O<sub>4</sub>@FNF, Ni(OH)<sub>2</sub>@NF, FNF and NF.

| Sample                                | Double-layer capacitance<br>(C <sub>dl</sub> , μF cm <sup>-2</sup> ) | Roughness factor<br>(R <sub>f</sub> ) <sup>a</sup> | <i>j</i> @ 1.50 V vs. RHE<br>(mA cm <sup>-2</sup> ) | <i>j</i> <sub>specific</sub> @ 1.50 V vs. RHE<br>(mA cm <sup>-2</sup> ) <sup>b</sup> |
|---------------------------------------|----------------------------------------------------------------------|----------------------------------------------------|-----------------------------------------------------|--------------------------------------------------------------------------------------|
| NiFe <sub>2</sub> O <sub>4</sub> @FNF | 946.95                                                               | 15.78                                              | 15.93                                               | 1.009                                                                                |
| Ni(OH) <sub>2</sub> @NF               | 799.77                                                               | 13.33                                              | 1.56                                                | 0.117                                                                                |
| FNF                                   | 490.46                                                               | 8.17                                               | 0.309                                               | 0.038                                                                                |
| NF                                    | 467.8                                                                | 7.80                                               | 0.208                                               | 0.027                                                                                |

<sup>a</sup>According to previous report,<sup>32</sup> the C<sub>dl</sub> of an ideal flat electrode is ~60 μF cm<sup>-2</sup>. R<sub>f</sub> is therefore

calculated using  $R_f = \frac{C_{dl}}{60} \times 1000$ .

<sup>b</sup>*j*<sub>specific</sub> is calculated using  $j_{specific} = \frac{j}{R_f}$ , where *j* is the apparent OER current density.



## Reference

- 1 J. Tian, Z. Xing, Q. Chu, Q. Liu, A. M. Asiri, A. H. Qusti, A. O. Al-Youbi and X. Sun, *CrystEngComm*, 2013, **15**, 8300–8305.
- 2 J. Liu, Y. Zheng, Z. Wang, Z. Lu, A. Vasileff and S.-Z. Qiao, *Chem. Commun.*, 2018, **54**, 463–466.
- 3 J. Liu, Y. Zheng, Y. Jiao, Z. Wang, Z. Lu, A. Vasileff and S.-Z. Qiao, *Small*, 2018, **14**, 1704073.
- 4 Y. Ma, X. Dai, M. Liu, J. Yong, H. Qiao, A. Jin, Z. Li, X. Huang, H. Wang and X. Zhang, *ACS Appl. Mater. Interfaces*, 2016, **8**, 34396–34404.
- 5 V. Maruthapandian, M. Mathankumar, V. Saraswathy, B. Subramanian and S. Muralidharan, *ACS Appl. Mater. Interfaces*, 2017, **9**, 13132–13141.
- 6 H. Yang, Y. Liu, S. Luo, Z. Zhao, X. Wang, Y. Luo, Z. Wang, J. Jin and J. Ma, *ACS Catal.*, 2017, **7**, 5557–5567.
- 7 G. Liu, K. Wang, X. Gao, D. He and J. Li, *Electrochim. Acta*, 2016, **211**, 871–878.
- 8 C. Mahala, M. D. Sharma and M. Basu, *Electrochim. Acta*, 2018, **273**, 462–473.
- 9 M. Y. Gao, J. R. Zeng, Q. B. Zhang, C. Yang, X. T. Li, Y. X. Hua and C. Y. Xu, *J. Mater. Chem. A*, 2018, **6**, 1551–1560.
- 10 Z. Fang, Z. Hao, Q. Dong and Y. Cui, *J. Nanopart. Res.*, 2018, **20**, 106.
- 11 G. Zhang, Y. Li, Y. Zhou and F. Yang, *ChemElectroChem*, 2016, **3**, 1927–1936.
- 12 H. Chen, X. Huang, L.-J. Zhou, G.-D. Li, M. Fan and X. Zou, *ChemCatChem*, 2016, **8**, 992–1000.
- 13 J. Liu, D. Zhu, T. Ling, A. Vasileff and S.-Z. Qiao, *Nano Energy*, 2017, **40**, 264–273.
- 14 R. K. Vishnu Prataap and S. Mohan, *Chem. Commun.*, 2017, **53**, 3365–3368.

- 15 W. Liu, K. Du, L. Liu, J. Zhang, Z. Zhu, Y. Shao and M. Li, *Nano Energy*, 2017, **38**, 576–584.
- 16 S. L. Candelaria, N. M. Bedford, T. J. Woehl, N. S. Rentz, A. R. Showalter, S. Pylypenko, B. A. Bunker, S. Lee, B. Reinhart, Y. Ren, S. P. Ertem, E. B. Coughlin, N. A. Sather, J. L. Horan, A. M. Herring and L. F. Greenlee, *ACS Catal.*, 2017, **7**, 365–379.
- 17 D. Liu, S. Ding, C. Wu, W. Gan, C. Wang, D. Cao, Z. u. Rehman, Y. Sang, S. Chen, X. Zheng, Y. Wang, B. Ge and L. Song, *J. Mater. Chem. A*, 2018, **6**, 6840–6846.
- 18 Z. Lu, H. Wang, D. Kong, K. Yan, P.-C. Hsu, G. Zheng, H. Yao, Z. Liang, X. Sun and Y. Cui, *Nat. Commun.*, 2014, **5**, 4345.
- 19 Y. Zhou, C.-K. Dong, L. L. Han, J. Yang and X.-W. Du, *ACS Catal.*, 2016, **6**, 6699–6703.
- 20 X. Deng, S. Öztürk, C. Weidenthaler and H. Tüysüz, *ACS Appl. Mater. Interfaces*, 2017, **9**, 21225–21233.
- 21 B. Zhao, L. Zhang, D. Zhen, S. Yoo, Y. Ding, D. Chen, Y. Chen, Q. Zhang, B. Doyle, X. Xiong and M. Liu, *Nat. Commun.*, 2017, **8**, 14586.
- 22 X. Fan, Y. Liu, S. Chen, J. Shi, J. Wang, A. Fan, W. Zan, S. Li, W. A. Goddard and X.-M. Zhang, *Nat. Commun.*, 2018, **9**, 1809.
- 23 F. Song and X. Hu, *Nat. Commun.*, 2014, **5**, 4477.
- 24 P. F. Liu, S. Yang, L. R. Zheng, B. Zhang and H. G. Yang, *J. Mater. Chem. A*, 2016, **4**, 9578–9584.
- 25 P. Guo, J. Wu, X.-B. Li, J. Luo, W.-M. Lau, H. Liu, X.-L. Sun and L.-M. Liu, *Nano Energy*, 2018, **47**, 96–104.
- 26 Y. Zhang, B. Ouyang, J. Xu, G. Jia, S. Chen, R. S. Rawat and H. J. Fan, *Angew. Chem. Int. Ed.*, 2016, **55**, 8670–8674.

- 27 P. Chen, K. Xu, Z. Fang, Y. Tong, J. Wu, X. Lu, X. Peng, H. Ding, C. Wu and Y. Xie, *Angew. Chem. Int. Ed.*, 2015, **54**, 14710–14714.
- 28 C. Walter, P. W. Menezes, S. Orthmann, J. Schuch, P. Connor, B. Kaiser, M. Lerch and M. Driess, *Angew. Chem. Int. Ed.*, 2018, **57**, 698–702.
- 29 G. Zhang, G. Wang, Y. Liu, H. Liu, J. Qu and J. Li, *J. Am. Chem. Soc.*, 2016, **138**, 14686–14693.
- 30 D. Li, H. Baydoun, B. Kulikowski and S. L. Brock, *Chem. Mater.*, 2017, **29**, 3048–3054.
- 31 Z. Liu, G. Zhang, K. Zhang, H. Liu and J. Qu, *ACS Sustainable Chem. Eng.*, 2018, **6**, 7206–7211.
- 32 S. Levine and A. L. Smith, *Discuss. Faraday Soc.*, 1971, **52**, 290–301.
